# Supplementary material for: Surface modification of the Ti surface with nanoscale bio-MOF-1 for improving biocompatibility and osteointegration in vitro and in vivo
Source: Royal Society of Chemistry journal article supplement (doi:10.1039/d2tb01311h), 2022-01-01
Supplement: d2tb01311h1.pdf [file d2tb01311h1.pdf]

## Supporting Information

Surface modification of Ti surface with nanoscale bio-MOF-1 for  
improving biocompatibility and osteointegration *in vitro* and *in vivo*

Jiixin Wu,<sup>a</sup> Shaokang Jiang,<sup>a</sup> Wenjia Xie,<sup>a</sup> Yiyuan Xue,<sup>a</sup> Mingxin Qiao,<sup>a</sup> Xiangjun Yang,<sup>a</sup> Xin  
Zhang,<sup>a</sup> Qianbing Wan,<sup>a</sup> Jian Wang,<sup>a</sup> Junyu Chen\*<sup>a</sup>, Xibo Pei\*<sup>a</sup>

<sup>a</sup> State Key Laboratory of Oral Diseases, National Clinical Research Center for Oral Diseases,  
Department of Prosthodontics, West China Hospital of Stomatology, Sichuan University, Chengdu  
610041, Sichuan Province, China.

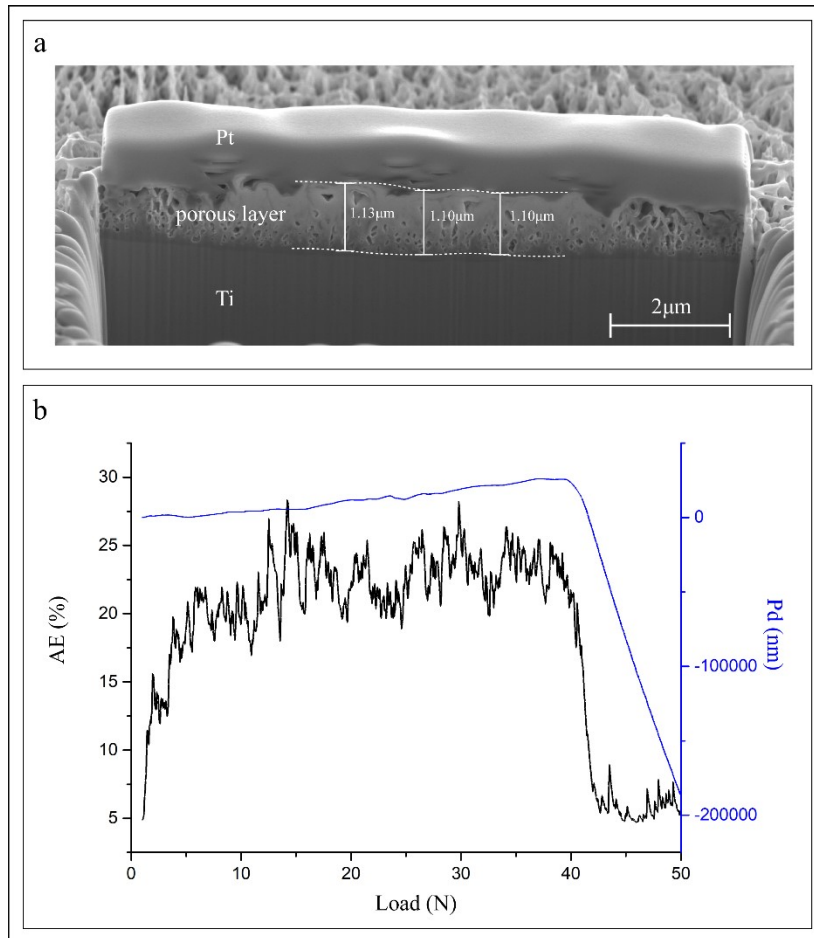

Fig. S1. Thickness of porous structure formed by alkali-heat treatment (a) and binding force between the deposited layer and substrate. (b)

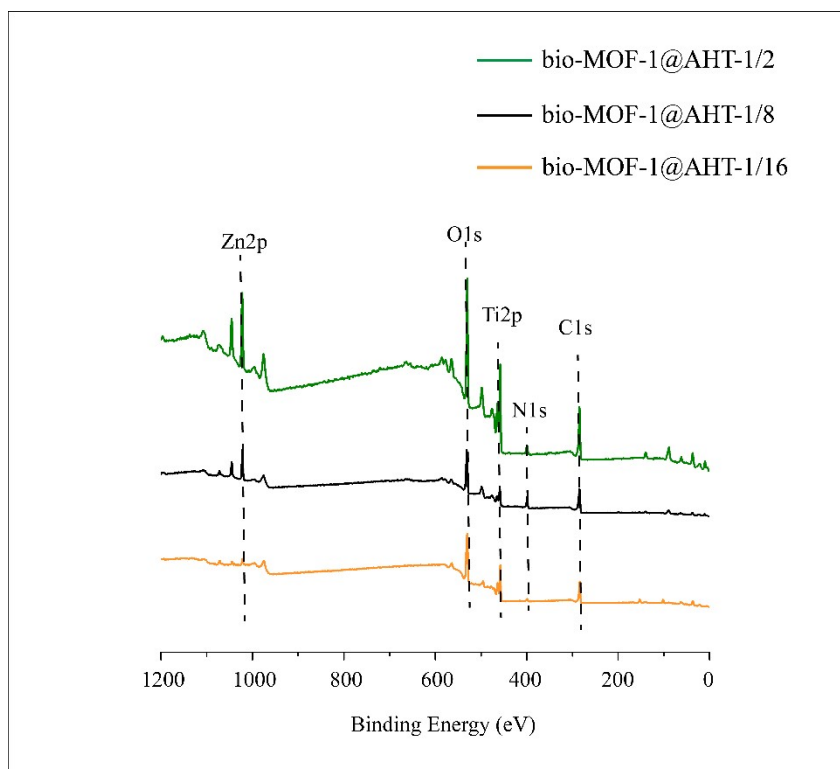

Fig. S2. XPS patterns of the as-prepared AHT and bio-MOF-1@AHTs.

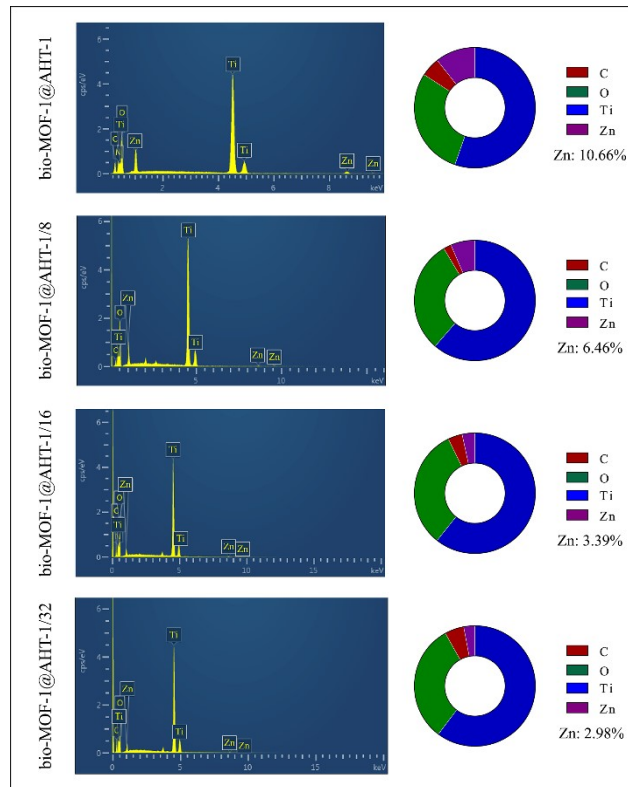

Fig. S3. EDS patterns of the as-prepared bio-MOF-1@AHTs.

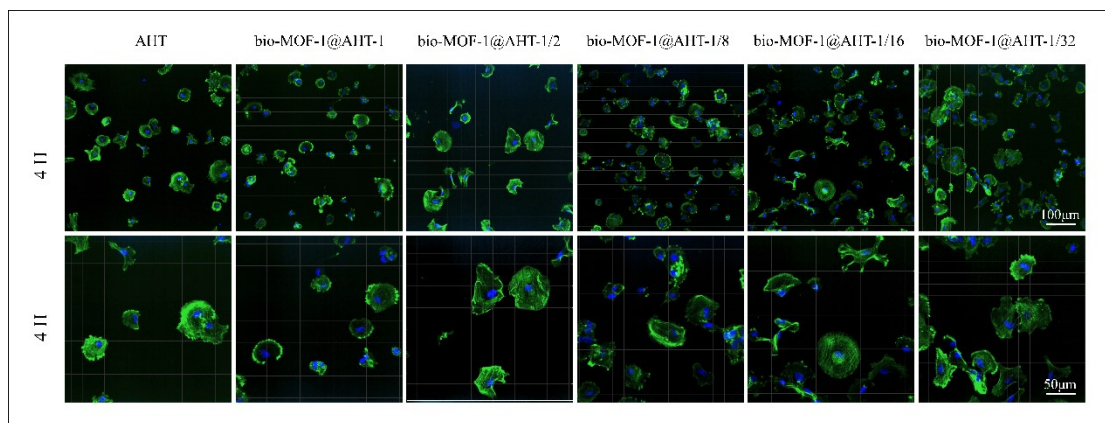

Fig. S4. The fluorescent images of cells incubated on AHT and bio-MOF-1@AHT surfaces at 4 h.

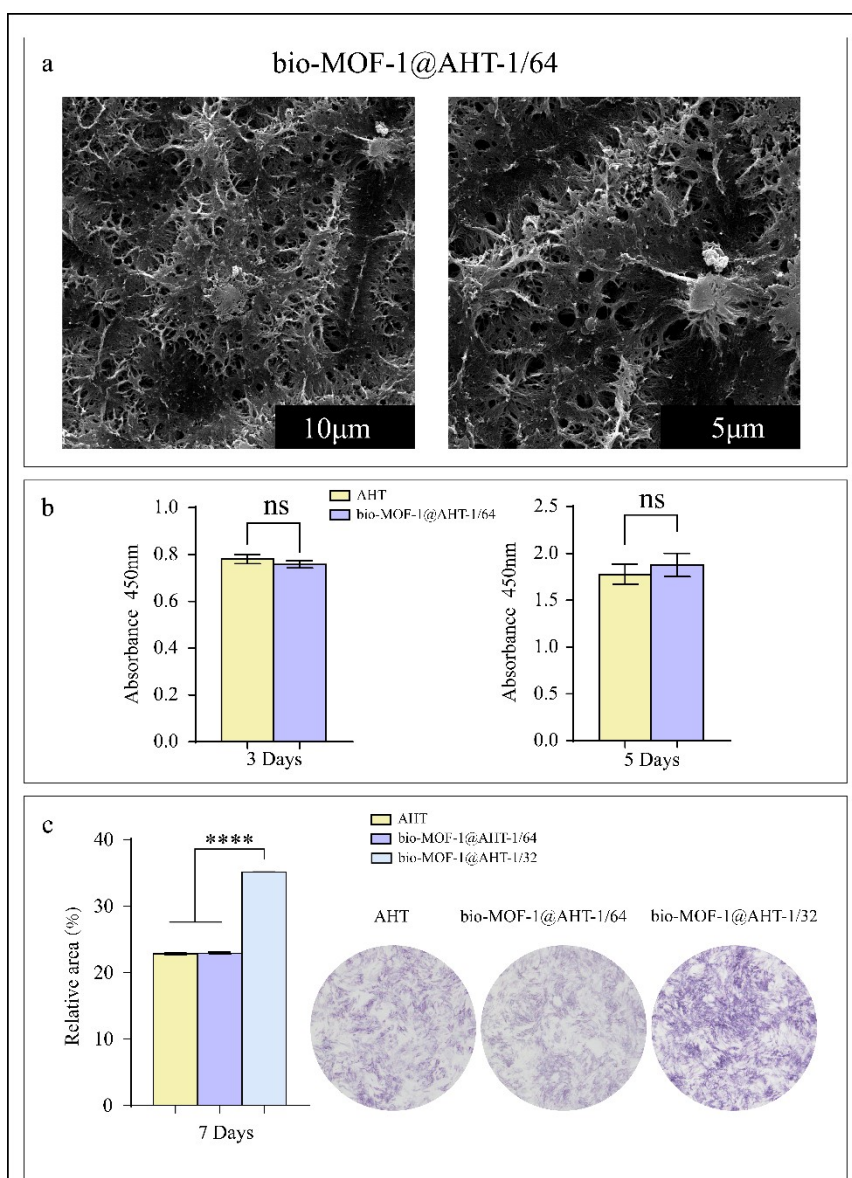

Fig. S5. (a) SEM images of bio-MOF-1@AHT-1/64. CCK-8 (b) and ALP activity kit (c) of AHT, bio-MOF-1@AHT-1/64, and bio-MOF-1@AHT-1/32.

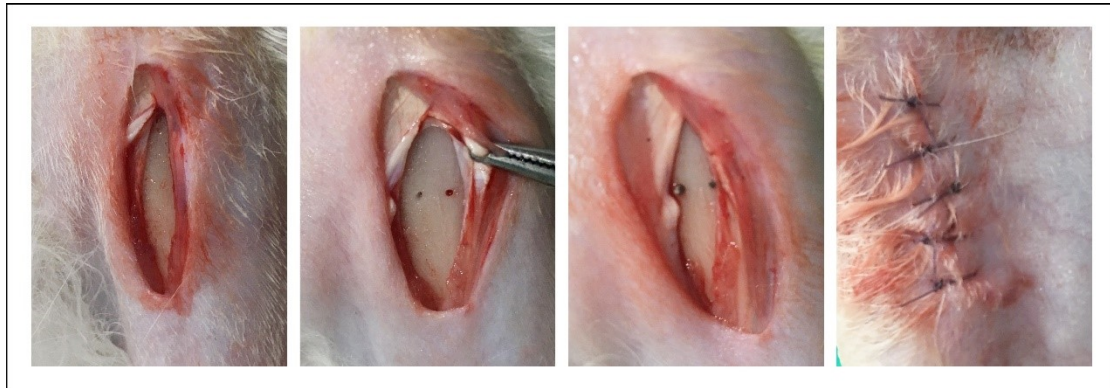

Figure. S6 Surgery of implantation on the tibia of rabbit.

|                                       |         |                           |
|---------------------------------------|---------|---------------------------|
| $\beta$ -Actin ( <i>Actb</i> )        | forward | CTCTGTGTGGATTGGTGGCT      |
|                                       | reverse | CGCAGCTCAGTAACAGTCCG      |
| COL1 ( <i>Coll</i> )                  | forward | GTACATCAGCCCAAACCCCA      |
|                                       | reverse | CAGGATCGGAACCTTCGCTT      |
| ALP ( <i>Alp</i> )                    | forward | GGCGTCCATGAGCAGAACTACATC  |
|                                       | reverse | CAGGCACAGTGGTCAAGGTTGG    |
| RUNX2 ( <i>Runx2</i> )                | forward | CCGTGGCCTTCAAGGTTGTA      |
|                                       | reverse | ATTTTCGTAGCTCGGCAGAGTAGTT |
| BMP2 ( <i>Bmp2</i> )                  | forward | AGAGCTTTGATGTCACCCCG      |
|                                       | reverse | AACCCTCCACAACCATGTCC      |
| OPN ( <i>Spp1</i> )                   | forward | TGAGTTTGGCAGCTCAGAGG      |
|                                       | reverse | CTTCCCGTTGCTGTCCTGAT      |
| OSX ( <i>Sp7</i> )                    | forward | GCCTACTTACCCGTCTGACTTTGC  |
|                                       | reverse | CCCTCCAGTTGCCACTATTGC     |
| WNT ( <i>Wnt</i> )                    | forward | CGGGTTCTTCTCTGGTCCTTG     |
|                                       | reverse | GGGCATGATCTCCACGTAGT      |
| AKT ( <i>Akt</i> )                    | forward | ACCTCTGAGACCGACACCAG      |
|                                       | reverse | AGGAGAACTGGGGAAAGTGC      |
| $\beta$ -catenin<br>( <i>Ctnnb1</i> ) | forward | ATCATTCTGGCCAGTGGTGG      |
|                                       | reverse | GACAGCACCTTCAGCACTCT      |

Table S1. Primers used for qRT-PCR analysis.
